# Supplementary material
Source: PubMed Central journal article supplement (PMC4363798)
Supplement: Supp_Table2.pdf [file Supp_Table2.pdf]

SUPPLEMENTARY TABLE S2. COMPARISONS OF OPTIMAL CUTOFFS OF ANTHROPOMETRIC MEASURES, AND ADJUSTED HRs, 95% CONFIDENCE INTERVALS AND *P*-VALUES OF HIGH- VS. LOW-RISK GROUPS DETERMINED BASED ON THE CUTOFFS BETWEEN ALL CANCERS WITH AND WITHOUT BREAST CANCER

| <i>Measures</i>          | <i>Stratification</i> | <i>All cancers</i> |           |              | <i>All cancers except breast cancer</i> |           |              |
|--------------------------|-----------------------|--------------------|-----------|--------------|-----------------------------------------|-----------|--------------|
|                          |                       | <i>Cutoff</i>      | <i>HR</i> | <i>95%CI</i> | <i>Cutoff</i>                           | <i>HR</i> | <i>95%CI</i> |
| Weight (kg)              | Overall               | 89                 | 1.18      | (1.14–1.23)  | 89                                      | 1.21      | (1.15–1.28)  |
|                          | HT ever               | 89                 | 1.15      | (1.09–1.22)  |                                         |           |              |
|                          | HT never              | 82                 | 1.25      | (1.19–1.31)  | 82                                      | 1.22      | (1.15–1.30)  |
| BMI (kg/m <sup>2</sup> ) | Overall               | 31                 | 1.16      | (1.12–1.20)  | 34                                      | 1.16      | (1.11–1.22)  |
|                          | HT ever               | 34                 | 1.09      | (1.02–1.16)  |                                         |           |              |
|                          | HT never              | 30                 | 1.25      | (1.19–1.30)  | 36                                      | 1.21      | (1.14–1.29)  |
| Wt/Ht (kg/m)             | Overall               | 53                 | 1.19      | (1.15–1.24)  | 53                                      | 1.19      | (1.13–1.25)  |
|                          | HT ever               | 53                 | 1.10      | (1.04–1.17)  |                                         |           |              |
|                          | HT never              | 51                 | 1.24      | (1.19–1.30)  | 52                                      | 1.25      | (1.18–1.34)  |
| WC (cm)                  | Overall               | 94                 | 1.16      | (1.12–1.20)  | 102                                     | 1.15      | (1.10–1.20)  |
|                          | HT ever               | 94                 | 1.11      | (1.06–1.17)  | 94                                      | 1.10      | (1.03–1.17)  |
|                          | HT never              | 88                 | 1.12      | (1.07–1.17)  | 102                                     | 1.20      | (1.13–1.27)  |
| WC/Ht (cm/cm)            | Overall               | 0.61               | 1.17      | (1.13–1.21)  | 0.61                                    | 1.16      | (1.11–1.20)  |
|                          | HT ever               | 0.56               | 1.10      | (1.05–1.16)  | 0.58                                    | 1.09      | (1.02–1.16)  |
|                          | HT never              | 0.60               | 1.22      | (1.16–1.28)  | 0.61                                    | 1.21      | (1.15–1.29)  |
| WHR (cm/cm)              | Overall               | 0.80               | 1.09      | (1.06–1.12)  | 0.80                                    | 1.10      | (1.06–1.14)  |
|                          | HT ever               | 0.80               | 1.04*     | (1.00–1.08)  | 0.92                                    | 1.04*     | (0.99–1.09)  |
|                          | HT never              | 0.77               | 1.20      | (1.14–1.08)  | 0.77                                    | 1.14      | (1.08–1.20)  |

\*Not significant with  $p > 0.05$ .
