# Supplementary material
Source: PubMed Central journal article supplement (PMC4363798)
Supplement: Supp_Table3.pdf [file Supp_Table3.pdf]

SUPPLEMENTARY TABLE S3. SENSITIVITY, SPECIFICITY, AND AREA UNDER ROC CURVE OF THE ANTHROPOMETRIC CUTOFFS FOR FIVE- AND TEN-YEAR INCIDENCE OF THE CORRESPONDING CANCER SITES

| Measures                 | Cancer site            | Cutoffs | 5-year incidence |             |              |      | 10-year incidence |             |              |      |
|--------------------------|------------------------|---------|------------------|-------------|--------------|------|-------------------|-------------|--------------|------|
|                          |                        |         | Sensitivity      | Specificity | Youden index | AUC  | Sensitivity       | Specificity | Youden index | AUC  |
| Weight (kg)              | Breast                 | 76      | 0.40             | 0.64        | 0.04         | 0.52 | 0.40              | 0.64        | 0.04         | 0.53 |
|                          | HT ever <sup>a</sup>   | 69      | 0.52             | 0.49        | 0.01         | 0.51 | 0.53              | 0.49        | 0.02         | 0.51 |
|                          | HT never <sup>a</sup>  | 77      | 0.48             | 0.62        | 0.10         | 0.55 | 0.46              | 0.62        | 0.08         | 0.55 |
|                          | Colorectal             | 82      | 0.30             | 0.76        | 0.06         | 0.55 | 0.30              | 0.76        | 0.05         | 0.54 |
|                          | Lung (ES)              | 76      | 0.70             | 0.37        | 0.07         | 0.55 | 0.69              | 0.37        | 0.06         | 0.55 |
|                          | Colon                  | 75      | 0.45             | 0.62        | 0.07         | 0.54 | 0.45              | 0.62        | 0.07         | 0.54 |
|                          | Endometrium            | 86      | 0.27             | 0.83        | 0.10         | 0.57 | 0.28              | 0.83        | 0.11         | 0.58 |
|                          | HT ever                | 78      | 0.30             | 0.75        | 0.06         | 0.52 | 0.29              | 0.75        | 0.04         | 0.51 |
|                          | HT never               | 89      | 0.41             | 0.84        | 0.25         | 0.67 | 0.40              | 0.84        | 0.24         | 0.68 |
|                          | Kidney                 | 79      | 0.38             | 0.70        | 0.08         | 0.54 | 0.44              | 0.70        | 0.14         | 0.58 |
|                          | All cancers            | 89      | 0.16             | 0.85        | 0.01         | 0.51 | 0.16              | 0.86        | 0.02         | 0.52 |
|                          | HT ever                | 89      | 0.12             | 0.88        | 0.00         | 0.50 | 0.13              | 0.88        | 0.01         | 0.51 |
| HT never                 | 82                     | 0.33    | 0.72             | 0.05        | 0.53         | 0.33 | 0.72              | 0.05        | 0.54         |      |
| BMI (kg/m <sup>2</sup> ) | Breast                 | 30      | 0.33             | 0.70        | 0.03         | 0.52 | 0.33              | 0.70        | 0.03         | 0.52 |
|                          | HT ever                | 33      | 0.15             | 0.86        | 0.01         | 0.50 | 0.15              | 0.86        | 0.01         | 0.51 |
|                          | HT never               | 28      | 0.56             | 0.53        | 0.09         | 0.55 | 0.54              | 0.53        | 0.06         | 0.54 |
|                          | Colorectal             | 31      | 0.30             | 0.75        | 0.05         | 0.55 | 0.31              | 0.75        | 0.06         | 0.55 |
|                          | Lung (ES) <sup>b</sup> | 21      | 0.11             | 0.93        | 0.04         | 0.55 | 0.11              | 0.93        | 0.04         | 0.54 |
|                          | Colon                  | 27      | 0.56             | 0.51        | 0.07         | 0.54 | 0.56              | 0.51        | 0.07         | 0.55 |
|                          | HT ever                | 31      | 0.20             | 0.83        | 0.02         | 0.51 | 0.21              | 0.83        | 0.03         | 0.50 |
|                          | HT never               | 33      | 0.42             | 0.81        | 0.23         | 0.67 | 0.43              | 0.81        | 0.24         | 0.68 |
|                          | Endometrium            | 34      | 0.21             | 0.87        | 0.08         | 0.56 | 0.23              | 0.87        | 0.10         | 0.57 |
|                          | Kidney                 | 36      | 0.13             | 0.91        | 0.04         | 0.54 | 0.17              | 0.91        | 0.07         | 0.58 |
|                          | All cancers            | 31      | 0.27             | 0.75        | 0.02         | 0.51 | 0.27              | 0.75        | 0.02         | 0.52 |
|                          | HT ever                | 34      | 0.11             | 0.89        | 0.00         | 0.50 | 0.12              | 0.89        | 0.00         | 0.50 |
| HT never                 | 30                     | 0.40    | 0.65             | 0.05        | 0.53         | 0.39 | 0.65              | 0.05        | 0.53         |      |
| Wt/Ht (kg/m)             | Breast                 | 47      | 0.38             | 0.65        | 0.03         | 0.52 | 0.39              | 0.65        | 0.04         | 0.52 |
|                          | HT ever                | 53      | 0.15             | 0.85        | 0.00         | 0.50 | 0.16              | 0.85        | 0.01         | 0.51 |
|                          | HT never               | 46      | 0.53             | 0.56        | 0.09         | 0.55 | 0.51              | 0.56        | 0.07         | 0.55 |
|                          | Colorectal             | 48      | 0.39             | 0.68        | 0.07         | 0.55 | 0.39              | 0.68        | 0.07         | 0.55 |
|                          | Lung (ES)              | 46      | 0.67             | 0.40        | 0.07         | 0.55 | 0.66              | 0.40        | 0.05         | 0.54 |
|                          | Colon                  | 44      | 0.55             | 0.53        | 0.08         | 0.54 | 0.55              | 0.53        | 0.07         | 0.55 |
|                          | Endometrium            | 54      | 0.25             | 0.86        | 0.11         | 0.57 | 0.26              | 0.86        | 0.11         | 0.58 |
|                          | HT ever                | 51      | 0.19             | 0.84        | 0.03         | 0.52 | 0.20              | 0.84        | 0.04         | 0.51 |
|                          | HT never               | 54      | 0.42             | 0.82        | 0.25         | 0.67 | 0.42              | 0.83        | 0.25         | 0.68 |
|                          | Kidney                 | 58      | 0.14             | 0.90        | 0.05         | 0.54 | 0.17              | 0.90        | 0.07         | 0.58 |
|                          | All cancers            | 53      | 0.19             | 0.82        | 0.01         | 0.51 | 0.20              | 0.82        | 0.02         | 0.52 |
|                          | HT ever                | 53      | 0.15             | 0.85        | 0.00         | 0.50 | 0.16              | 0.85        | 0.01         | 0.51 |
| HT never                 | 51                     | 0.31    | 0.73             | 0.05        | 0.53         | 0.31 | 0.73              | 0.05        | 0.53         |      |
| WC (cm)                  | Breast                 | 87      | 0.45             | 0.58        | 0.03         | 0.52 | 0.45              | 0.58        | 0.03         | 0.52 |
|                          | HT ever                | 93      | 0.25             | 0.76        | 0.01         | 0.51 | 0.25              | 0.76        | 0.02         | 0.51 |
|                          | HT never               | 82      | 0.69             | 0.38        | 0.07         | 0.55 | 0.68              | 0.38        | 0.06         | 0.54 |
|                          | Colorectal             | 87      | 0.53             | 0.58        | 0.11         | 0.57 | 0.53              | 0.58        | 0.11         | 0.58 |
|                          | Lung (ES)              | 86      | 0.52             | 0.47        | -0.01        | 0.49 | 0.46              | 0.53        | 0.00         | 0.51 |
|                          | Colon                  | 76      | 0.85             | 0.25        | 0.10         | 0.57 | 0.85              | 0.25        | 0.10         | 0.58 |
|                          | Endometrium            | 104     | 0.18             | 0.90        | 0.08         | 0.56 | 0.18              | 0.90        | 0.08         | 0.57 |
|                          | HT ever                | 110     | 0.07             | 0.97        | 0.04         | 0.52 | 0.05              | 0.97        | 0.02         | 0.51 |
|                          | HT never               | 94      | 0.54             | 0.72        | 0.25         | 0.67 | 0.55              | 0.72        | 0.26         | 0.68 |
|                          | Kidney                 | 91      | 0.44             | 0.68        | 0.11         | 0.57 | 0.48              | 0.68        | 0.16         | 0.60 |
|                          | All cancers            | 94      | 0.29             | 0.74        | 0.03         | 0.53 | 0.29              | 0.75        | 0.04         | 0.53 |
|                          | HT ever                | 94      | 0.23             | 0.78        | 0.01         | 0.51 | 0.24              | 0.78        | 0.02         | 0.52 |
| HT never                 | 88                     | 0.52    | 0.55             | 0.07        | 0.55         | 0.51 | 0.55              | 0.06        | 0.55         |      |
| WC/Ht (cm/cm)            | Breast                 | 0.56    | 0.37             | 0.66        | 0.03         | 0.52 | 0.37              | 0.66        | 0.03         | 0.52 |
|                          | HT ever                | 0.56    | 0.31             | 0.71        | 0.02         | 0.50 | 0.32              | 0.71        | 0.02         | 0.51 |
|                          | HT never               | 0.51    | 0.69             | 0.38        | 0.07         | 0.55 | 0.68              | 0.38        | 0.06         | 0.54 |
|                          | Colorectal             | 0.49    | 0.75             | 0.34        | 0.10         | 0.57 | 0.76              | 0.34        | 0.10         | 0.57 |
|                          | Lung (ES)              | 0.51    | 0.42             | 0.57        | -0.02        | 0.48 | 0.42              | 0.57        | -0.01        | 0.49 |

(continued)

SUPPLEMENTARY TABLE S3. (CONTINUED)

| <i>Measures</i> | <i>Cancer site</i> | <i>Cutoffs</i> | <i>5-year incidence</i> |                    |                     |            | <i>10-year incidence</i> |                    |                     |            |
|-----------------|--------------------|----------------|-------------------------|--------------------|---------------------|------------|--------------------------|--------------------|---------------------|------------|
|                 |                    |                | <i>Sensitivity</i>      | <i>Specificity</i> | <i>Youden index</i> | <i>AUC</i> | <i>Sensitivity</i>       | <i>Specificity</i> | <i>Youden index</i> | <i>AUC</i> |
| WHR<br>(cm/cm)  | Colon              | 0.49           | 0.76                    | 0.34               | 0.11                | 0.57       | 0.77                     | 0.34               | 0.11                | 0.58       |
|                 | Endometrium        | 0.60           | 0.29                    | 0.81               | 0.09                | 0.55       | 0.30                     | 0.81               | 0.11                | 0.57       |
|                 | HT ever            | 0.68           | 0.07                    | 0.97               | 0.04                | 0.51       | 0.06                     | 0.97               | 0.02                | 0.50       |
|                 | HT never           | 0.55           | 0.66                    | 0.58               | 0.24                | 0.66       | 0.69                     | 0.58               | 0.28                | 0.68       |
|                 | Kidney             | 0.55           | 0.50                    | 0.62               | 0.12                | 0.56       | 0.54                     | 0.62               | 0.16                | 0.60       |
|                 | All cancers        | 0.61           | 0.20                    | 0.82               | 0.02                | 0.52       | 0.21                     | 0.82               | 0.03                | 0.53       |
|                 | HT ever            | 0.56           | 0.31                    | 0.71               | 0.02                | 0.51       | 0.31                     | 0.71               | 0.03                | 0.52       |
|                 | HT never           | 0.60           | 0.31                    | 0.74               | 0.05                | 0.54       | 0.30                     | 0.75               | 0.05                | 0.54       |
|                 | Breast             | 0.79           | 0.59                    | 0.43               | 0.02                | 0.51       | 0.60                     | 0.43               | 0.02                | 0.51       |
|                 | Colorectal         | 0.75           | 0.84                    | 0.22               | 0.06                | 0.57       | 0.86                     | 0.22               | 0.08                | 0.58       |
|                 | Colon              | 0.76           | 0.81                    | 0.26               | 0.08                | 0.57       | 0.82                     | 0.27               | 0.09                | 0.58       |
|                 | Endometrium        | 0.89           | 0.18                    | 0.87               | 0.05                | 0.52       | 0.18                     | 0.87               | 0.06                | 0.54       |
|                 | HT never           | 0.81           | 0.63                    | 0.50               | 0.13                | 0.58       | 0.65                     | 0.50               | 0.15                | 0.60       |
|                 | Pancreas           |                |                         |                    |                     |            |                          |                    |                     |            |
|                 | HT never           | 0.86           | 0.47                    | 0.73               | 0.19                | 0.60       | 0.41                     | 0.73               | 0.14                | 0.58       |
|                 | NHL                | 0.94           | 0.00                    | 1.00               | 0.00                | 0.51       | 0.00                     | 1.00               | 0.00                | 0.51       |
|                 | Kidney             | 0.80           | 0.69                    | 0.48               | 0.18                | 0.60       | 0.67                     | 0.48               | 0.15                | 0.59       |
|                 | All cancers        | 0.80           | 0.56                    | 0.48               | 0.05                | 0.53       | 0.56                     | 0.49               | 0.05                | 0.53       |
|                 | HT ever            | 0.8            | 0.51                    | 0.52               | 0.03                | 0.52       | 0.51                     | 0.53               | 0.04                | 0.53       |
|                 | HT never           | 0.77           | 0.78                    | 0.27               | 0.05                | 0.55       | 0.78                     | 0.27               | 0.06                | 0.54       |
| Min             |                    |                | 0.00                    | 0.22               | -0.02               | 0.48       | 0.00                     | 0.22               | -0.01               | 0.49       |
|                 | HT ever            |                | 0.07                    | 0.49               | 0.00                | 0.50       | 0.05                     | 0.49               | 0.00                | 0.50       |
|                 | HT never           |                | 0.31                    | 0.27               | 0.05                | 0.53       | 0.30                     | 0.27               | 0.05                | 0.53       |
| Max             |                    |                | 0.85                    | 1.00               | 0.18                | 0.60       | 0.86                     | 1.00               | 0.16                | 0.60       |
|                 | HT ever            |                | 0.52                    | 0.97               | 0.06                | 0.52       | 0.53                     | 0.97               | 0.04                | 0.53       |
|                 | HT never           |                | 0.78                    | 0.84               | 0.25                | 0.67       | 0.78                     | 0.84               | 0.28                | 0.68       |
| Mean            |                    |                | 0.41                    | 0.65               | 0.06                | 0.54       | 0.42                     | 0.65               | 0.07                | 0.55       |
|                 | HT ever            |                | 0.23                    | 0.79               | 0.02                | 0.51       | 0.23                     | 0.79               | 0.02                | 0.51       |
|                 | HT never           |                | 0.51                    | 0.62               | 0.13                | 0.58       | 0.50                     | 0.62               | 0.12                | 0.58       |

<sup>a</sup>HT ever/never, ever/never use of hormone therapies (estrogen only or estrogen plus progesterone) at baseline.

<sup>b</sup>Lung cancer among ever smokers (ES).

AUC, area under curve; NHL, non-Hodgkin lymphoma.
